# Supplementary material for: Epigenetic modifications of interleukin-6 in synovial fibroblasts from osteoarthritis patients
Source: PubMed Central journal article supplement (PMC5337936; doi:10.1038/srep43592), 2017-03-06
Supplement: srep43592-s1.pdf [file srep43592-s1.pdf]

**Epigenetic modifications of interleukin-6 in synovial fibroblasts from  
osteoarthritis patients**

Fei Yang<sup>1</sup>, Song Zhou<sup>2</sup>, Chuandong Wang<sup>3</sup>, Yan Huang<sup>3</sup>, Huiwu Li<sup>1</sup>, You Wang<sup>1</sup>,  
Zhenan Zhu<sup>1</sup>, Jian Tang<sup>1\*</sup>, Mengning Yan<sup>1\*</sup>

1 Shanghai Key Laboratory of Orthopaedic Implants, Department of Orthopaedics,  
Shanghai Ninth People's Hospital, Shanghai Jiao Tong University School of  
Medicine, 639 Zhizaoju Road, Shanghai 200011, PR China

2 Department of Orthopaedics, Linyi People's Hospital, 27 East Jiefang Road , Linyi  
276000, PR China

3 The Key Laboratory of Stem Cell Biology, Institute of Health Sciences, Shanghai  
Institutes for Biological Sciences, Chinese Academy of Sciences & Shanghai Jiao  
Tong University School of Medicine, 320 Yueyang Road, Shanghai 200031, PR  
China

**Running title:** IL-6 epigenetic modifications in OA

\* Corresponding authors:

Mengning Yan

Tel/Fax: +86-21-63139920; E-mail address: [y\\_mengning@sina.com](mailto:y_mengning@sina.com)

Jian Tang

Tel/Fax: +86-21-63139920; E-mail address: [shjytangjian@sohu.com](mailto:shjytangjian@sohu.com)

GAAACCATCCAGCCATCCTCCCCATTTTCATTTTTCACACCAAAGAATCCC  
ACCGCGGCAGAGGACCACCGTCTCTGTTTAGACAATCGGTGAAGAATGGA  
TGACCTCACTTTCCCAACAGGCGGGTCTGAAATGTTATGCACGAAACA  
AACTTGAGTAAATGCCAACAGAGGTCACTGTTTTATCGATCTTGAAGA  
GATCTCTTCTTAGCAAAGCAAAGAAACCGATTGTGAAGGTAACACCATGT  
TTGGTAAATAAGTGTTTTGGTGTGTGCAAGGGTCTGGTTTCAGCCTGAA  
GCCATCTCAGAGCTGTCTGGGTCTCTGGAGACTGGAGGGACAACCTAGTC  
TAGAGCCATTTGCATGAGACCAAGGATCCTCCTGCAAGAGACCATCC  
TGAGGGAAGAGGGCTTCTGAACCAGCTTGACCAATAAGAAATTCTTGGG  
TGCCGACGCGGAAGCAGATTCAGAGCCTAGAGCCGTGCCTGCGTCCGTAG  
TTTCTTCTAGCTTCTTTTGATTTCAAATCAAGACTTACAGGGAGAGGGAG  
CGATAAACACAACTCTGCAAGATGCCACAAGGTCCTCCTTTGACATCCC  
CAACAAAGAGGTGAGTAGTATTCTCCCCCTTTCTGCCCTGAACCAAGTGG  
GCTTCAGTAATTCAGGGCTCCAGGAGACCTGGGGCCCATGCAGGTGCC  
CAGTGAAACAGTGGTGAAGAGACTCAGTGGCAATGGGGAGAGCACTGGC  
AGCACAAGGCAAACCTCTGGCACAGAGAGCAAAGTCCTCACTGGGAGGA  
TTCCAAGGGGTCACTTGGGAGAGGGCAGGGCAGCAGCCAACCTCCTCT  
AAGTGGGCTGAAGCAGGTGAAGAAAGTGGCAGAAGCCAAGCGGTGGCA  
AAAAGGAGTCACACACTCCACCTGGAGACCGCCTTGAAGTAACTGCACGA  
AATTTGAGGATGGCCAGGCAGTTCTACAACAGCCGCTCACAGGGAGAGC  
CAGAACACAGAAGAACTCAGATGACTGGTAGTATTACCTTCTTCATAATCC  
CAGGCTTGGGGGGCTGCGATGGAGTCAGAGGAAACTCAGTTCAGAACAT  
CTTTGGTTTTTACAAATACAAATTAAGTAAAGCGCTAAATTCTAGCCTGTIA  
ATCTGGTCACTGAAAAAAATTTTTTTTTTTTCAAAAAACATAGCTTTAGC  
TTATTTTTTTTCTCTTTGTAAAATTCGTGTCATGACTTCAGCTTTACTCTTT  
GTCAAGACATGCCAAAGTGCTGAGTCACTAATAAAAGAAAAAAGAAAG  
TAAAGGAAGAGTGGTTCTGCTTCTTAGCGCTAGCCTCAATGACCGACCTAA  
GCTGCACTTTTCCCCCTAGTTGTGTCTTGCCATGCTAAAGGACGTCACATT  
GCACAATCTTAATAAGGTTTCCAATCAGCCCCACCCTCTGGCCCCACCC  
TCACCCTCCAACAAAGATTTATCAAATGTGGGATTTTCCCATGAGTCTCAA

TATTAGAGTCTCAACCCCCAATAAATATAGGACTGGAGATGTCTGAGGCTC  
ATTCTGCCCTCGAGCCCACCGGGAACGAAAGAGAAGCTCTATCTCCCCTC  
CAGGAGCCCAGCTATGAACTCCTTCTCCACAAGTAAGTGCAGGAAATCCT  
TAGCCCTGGAAGTCCAGCGGCGGTGAGCCCTGTGTGAGGGAGGGGTG  
TGTGGCCCAGGGAGGGCTGGCGGGCGGCCAGCAGCAGAGGCAGGCTCCC  
AGCTGTGCTGTCAGCTCACCCCTGCGCTCGCTCCCCTCCGCGCACAGGCGC  
CTTCGGTCCAGTTGCCTTCTCCCTGGGGCTGCTCCTGGTGTGCTGCTGC  
CTTCCCTGCCCCAGTACCCCCAGGAGAAGATTCCAAAGATGTAGCCGCCC  
CACACAGACAGCCACTCACCTCTTCAGAACGAATTGACAAACAAATTCGG  
TACATCCTCGACGGCATCTCAGCCCTGAGAAAGGAGGTGGGTAGGCTT

 Transcription start site  CpG site  Forward primer  Reverse primer

**Figure S1**

**Figure S1. Human IL-6 promoter sequence investigated in the current study.**

The DNA sequence of -1500bp~+500bp around human IL-6 transcription start site was shown. Transcription start site was labeled in red, CpG site was labeled in yellow, forward primer site was labeled in gray and reverse primer site was labeled in green.

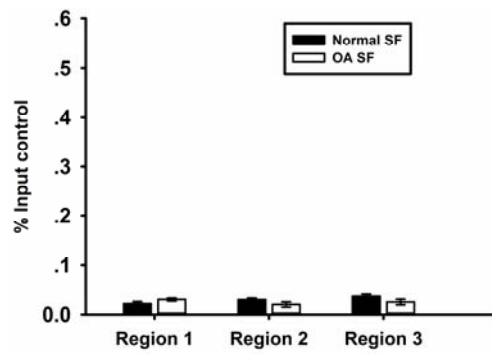

**Figure S2**

**Figure S2. Negative control for ChIP assay.** ChIP assays using IgG antibody in the region 1, 2, and 3 of human IL-6 were performed in normal and OA synovial fibroblasts (SF). The results were expressed as the percentage in input control. Data were shown as mean $\pm$ SD.

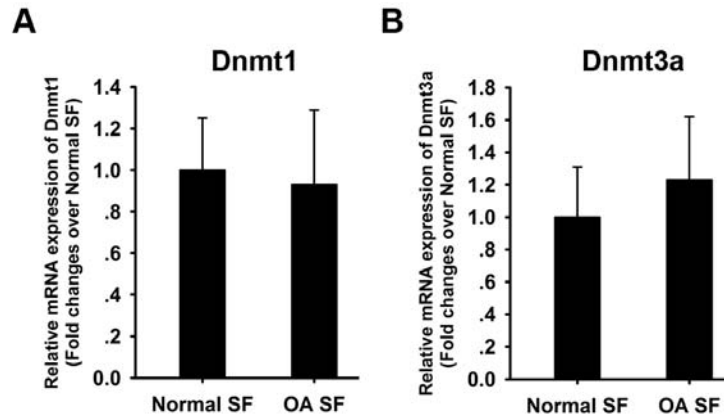

**Figure S3**

**Figure S3. Dnmt1 and Dnmt3a mRNA expression in synovial fibroblasts from OA patients.** Synovial fibroblasts (SF) were isolated from non-arthritic donors and OA patients and cultured *in vitro*. Total RNA was isolated for quantitative RT-PCR using Dnmt1 (**A**) and Dnmt3a (**B**) primers.  $\beta$ -actin was used as an internal control. The results are expressed as the fold-change relative to normal SF. Data are shown as the means $\pm$ SD.

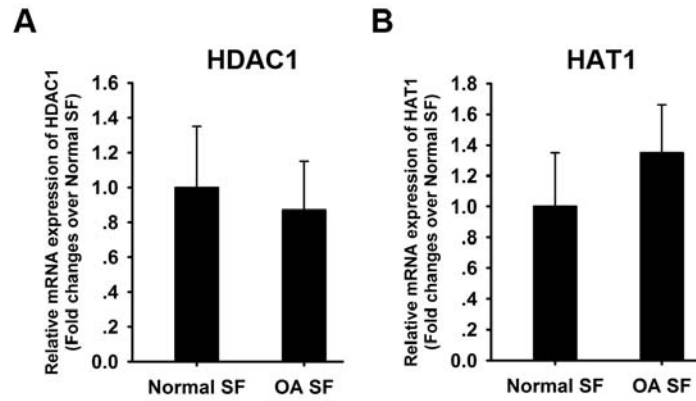

**Figure S4**

**Figure S4. HDAC1 and HAT1 mRNA expression in synovial fibroblasts from OA patients.** Synovial fibroblasts (SF) were isolated from non-arthritic donors and OA patients and cultured *in vitro*. Total RNA was isolated for quantitative RT-PCR using HDAC1 (A) and HAT1 (B) primers.  $\beta$ -actin was used as an internal control. The results are expressed as the fold-change relative to normal SF. Data are shown as the means $\pm$ SD.

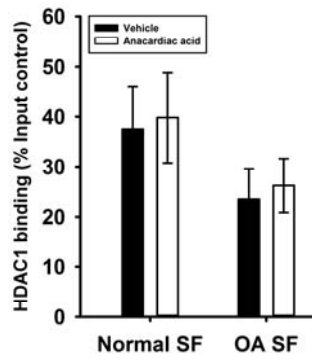

**Figure S5**

**Figure S5. HDAC1 binding in region 2 of the IL-6 promoter in response to anacardiac acid treatment.** Normal and OA synovial fibroblasts (SF) were treated with anacardiac acid (4  $\mu$ M). ChIP was performed to measure HDAC1 occupancy in region 2 of the IL-6 promoter. The results were normalized to the percentage of the input control. Data were shown as mean $\pm$ SD.
